# Supplementary material for: Life-cycle assessment and techno-economic analysis of the utilization of bio-oil components for the production of three chemicals
Source: Royal Society of Chemistry journal article supplement (doi:10.1039/c8gc01181h), 2018-01-01
Supplement: c8gc01181h1.pdf [file c8gc01181h1.pdf]

1 **Electronic Supplementary Information (ESI)**

2 **Life cycle assessment and techno-economic analysis of the utilization**  
3 **of bio-oil components for the production of three chemicals**

4

5 Ji-Lu Zheng <sup>a</sup>, Ya-Hong Zhu <sup>a</sup>, Ming-Qiang Zhu <sup>a, b\*</sup>, Guo-Tao Sun <sup>b</sup>, Run-Cang Sun <sup>c</sup>

6

7 <sup>a</sup> College of Forestry, Northwest A&F University, No. 3 Taicheng Road, Yangling,

8 Shaanxi 712100, China

9 <sup>b</sup> *Western Scientific Observation and Experiment Station of Development and*

10 *Utilization of Rural Renewable Energy of Ministry of Agriculture, Northwest A&F*

11 *University, Yangling 712100, China.*

12 <sup>c</sup> *Beijing Key Laboratory of Lignocellulosic Chemistry, Beijing Forestry University,*

13 *Beijing, China.*

14

15

16

17

18

19

20 \*Corresponding authors. Address: Northwest A&F University, 712100, Yangling,

21 China. Tel.: +86-029-87082230; Fax: +86-029-87082216.

22 E-mail address: zmqsx@nwsuaf.edu.cn (M. Q. Zhu).

## 24 **Contents**

|    |     |                                                                                   |    |
|----|-----|-----------------------------------------------------------------------------------|----|
| 25 | 1   | The procedures of the techno-economic-environmental analysis.....                 | 3  |
| 26 | 1.1 | Methodology for estimation of the total-capital investment.....                   | 3  |
| 27 | 1.2 | Methodology for estimation of the operating cost and direct production cost ..... | 5  |
| 28 | 1.3 | Methodology for estimation of cash flow and IRR .....                             | 6  |
| 29 | 1.4 | The average delivery distance.....                                                | 8  |
| 30 | 2   | Investment and production cost .....                                              | 9  |
| 31 | 2.1 | The investment.....                                                               | 9  |
| 32 | 2.2 | The production cost.....                                                          | 10 |
| 33 | 3   | Some background data for this LCA study.....                                      | 13 |
| 34 | 3.1 | LCI data for petrochemical production of phenol - formaldehyde resins (PF).....   | 13 |
| 35 | 3.2 | LCI data for petrochemical production of calcium acetate.....                     | 13 |
| 36 | 3.3 | The GWP100a, CED, EI-99 metric for some chemicals and utilities .....             | 13 |

## 37 1 The procedures of the techno-economic-environmental analysis

### 38 1.1 Methodology for estimation of the total-capital investment

39 **Table S1** Methodology for total-capital investment for nth plant

| Item                                         | Percent of TDEC |
|----------------------------------------------|-----------------|
| Total purchased equipment-delivered cost     | 100%            |
| Purchased equipment installation             | 39%             |
| Instrumentation and controls (installed)     | 13%             |
| Piping (installed)                           | 31%             |
| Electrical systems (installed)               | 10%             |
| Buildings (including services)               | 29%             |
| Yard improvements                            | 10%             |
| Service facilities (installed)               | 55%             |
| Total installed cost (TIC)                   | 287%            |
| Land (if purchase is required)               | 6%              |
| Engineering and supervision                  | 32%             |
| Construction expenses                        | 34%             |
| Total direct and indirect plant costs (TDIC) | 359%            |
| Contractor's fee (CF)                        | 5% of TDIC      |
| Contingency (CO)                             | 10% of TDIC     |
| Fixed-capital investment (FCI)               | TDIC+CF+CO      |
| Working capital                              | 15% of FCI      |
| Total capital investment                     | 475%            |

40

41 The total installed equipment cost is part of the total capital investment. The total  
42 capital investment for all processes consists of fixed-capital investment for physical  
43 equipment and facilities in the plant plus working capital which must be available to  
44 pay salaries, keep raw materials and products on hand, and handle other special items  
45 requiring a direct cash outlay. This method for estimating the total-capital investment  
46 is based on the percentage of delivered-equipment cost. Namely, the determination of  
47 the delivered-equipment cost is required firstly. The other items included in the fixed-  
48 capital investment are estimated as percentages of the delivered-equipment cost , and  
49 the working capital amounts to 15 percent of the fixed-capital investment.<sup>1</sup> The items  
50 included in the total-capital investment and the corresponding ratio factors based on  
51 delivered equipment cost are listed in Table S1. Unit process principles are used to  
52 determine the equipment specifications,<sup>1, 2</sup> and then the delivered-equipment cost of  
53 each piece of the process equipments can be estimated from appropriate  
54 manufacturers' bulletins, published cost data, empirical rules<sup>1-3</sup> or e-commerce  
55 websites (such as Alibaba) as listed in Table S2.

56 **Table S2** The delivered-equipment cost of each piece of the process equipments

| Equipments                   | Specification                                 | Delivered-equipment cost |
|------------------------------|-----------------------------------------------|--------------------------|
| <i>Sub 1</i>                 |                                               |                          |
| Chopper                      | 50 kw/ton                                     | \$44,137                 |
| Biomass Chopping Screen      | 60 ton/day                                    | \$3,286                  |
| Grinding Hammer Mill         | 50 kw/ton                                     | \$44,137                 |
| Biomass Grinding Screen      | 60 ton/day                                    | \$3,359                  |
| Belt Press                   | 5.5 kw                                        | \$19,425                 |
| Bale Moving Forklift*4       | 1.25 ton/h                                    | \$14,021                 |
| Concrete Storage Slab        | 30 m*29 m*3.5 m                               | \$87,631                 |
| Discharge Conveyor           | 0.75 kw/ton                                   | \$9,785                  |
| Bale Transport Conveyor      | 90 w/ton                                      | \$77,845                 |
| Bale Unwrapping Conveyor     | 5.5 kw                                        | \$29,210                 |
| Continuous Spray Rotary Drum | 2.2 kw, 2.5 ton/h                             | \$185,089                |
| Rotary Dryer                 | 2.2 kw                                        | \$99,519                 |
| Biomass Feeding Bin          | Φ1.5*4.3 m                                    | \$6,047                  |
| Screw Feeder                 | 0.75 kw/ton                                   | \$23,733                 |
| Pyrolysis Fluid Bed          | Φ1.2 m*2 m                                    | \$122,099                |
| Non-condensable Gas Blower   | 90 kw                                         | \$31,357                 |
| Pyrolysis Vapor Cyclones*2   | 3600 m <sup>3</sup> of gas per hour           | \$184,316                |
| Bio-oil Condenser*2          | 600 m <sup>2</sup> of heat transfer area      | \$291,722                |
| Electro-Static Precipitator  | 30 kw                                         | \$42,705                 |
| Condenser Water Pump*3       | 90 kw                                         | \$62,527                 |
| Ice making machine           | 53 /kw, 592 kg of ice per hour                | \$20,000                 |
| Condenser Oil Pump           | 5 kw                                          | \$6,952                  |
| Cooling Tower                | Φ 8.8m*6.5m                                   | \$438,898                |
| Wash Percolater              | 4 m <sup>3</sup>                              | \$31,459                 |
| Solids Combustor             | Φ0.3 m*0.8 m                                  | \$35,680                 |
| Combustor Cyclones           | 3360 m <sup>3</sup> of gas per hour           | \$161,343                |
| Combustion Gas Blower        | 85 kw                                         | \$9,084                  |
| <i>Sub 2</i>                 |                                               |                          |
| Settling Tank                | 3 m <sup>3</sup>                              | \$35,965                 |
| Filter, vacuum rotary drum   | 3 kw, 600 kg of filtrate /(m <sup>2</sup> .h) | \$185,089                |
| Vacuum pump                  | 10 kw                                         | \$28,655                 |
| Settling Tank                | 3 m <sup>3</sup>                              | \$35,965                 |
| Filter, vacuum rotary drum   | 3 kw, 600 kg of filtrate /(m <sup>2</sup> .h) | \$185,089                |
| Vacuum pump                  | 10 kw                                         | \$28,655                 |
| Mixer                        | 10 kw, 3m <sup>3</sup>                        | \$73,805                 |
| Vacuum freeze dryer          | 130 kw, 1.2 ton water per hour                | \$365,261                |
| Mixer                        | 10 kw, 3 m <sup>3</sup>                       | \$73,805                 |
| Filter, vacuum rotary drum   | 3 kw, 600 kg of filtrate /(m <sup>2</sup> .h) | \$185,089                |
| Evaporation crystallizer     | 1000 kg of acetic ether per                   | \$452,879                |
| Settling Tank                | 3 m <sup>3</sup>                              | \$35,965                 |

|                              |                                               |           |
|------------------------------|-----------------------------------------------|-----------|
| Filter, vacuum rotary drum   | 3 kw, 600 kg of filtrate /(m <sup>2</sup> .h) | \$185,089 |
| Vacuum pump                  | 10 kw                                         | \$28,655  |
| <i>Sub 3</i>                 |                                               |           |
| Mixer*2                      | 10 kw, 3 m <sup>3</sup>                       | \$147,610 |
| <i>Sub 4</i>                 |                                               |           |
| Evaporator                   | 600 kg of water per hour                      | \$349,285 |
| Mixer                        | 10 kw, 3 m <sup>3</sup>                       | \$73,805  |
| Evaporator                   | 600 kg of water per hour                      | \$349,285 |
| Mixer*4                      | 3 kw, 0.8 m <sup>3</sup>                      | \$104,268 |
| Filter, vacuum rotary drum*4 | 3 kw, 75 kg of filtrate /(m <sup>2</sup> .h)  | \$212,611 |
| Vacuum pump*4                | 10 kw                                         | \$114,620 |
| Evaporator*2                 | 50 kg of methanol per hour                    | \$190,110 |

57 **1.2 Methodology for estimation of the operating cost and direct production cost**

58 **Table S3** Variable costs employed in the estimation of the direct production costs

59 (Source: www.alibaba.com and refs).<sup>4-6</sup>

| Item                      | Value                   |
|---------------------------|-------------------------|
| Cotton straw              | \$83/metric ton         |
| <b>Fertilizer</b>         | <b>\$400/metric ton</b> |
| Transport                 | \$0.71/(ton.mile)       |
| Sulfuric acid 98 wt.%     | \$300/metric ton        |
| Process water             | \$1.0/metric ton        |
| Activated carbon          | \$1500/metric ton       |
| Calcium hydroxide         | \$110/metric ton        |
| Hydrochloric acid 32 wt.% | \$190/metric ton        |
| Ethyl acetate             | \$1200/metric ton       |
| Calcium oxide             | \$160/metric ton        |
| Methanol                  | \$700/metric ton        |
| Sodium hydroxide          | \$500/metric ton        |
| Phenol                    | \$1300/metric ton       |
| Formaldehyde 37 wt.%      | \$400/metric ton        |
| Cooling water from river  | \$0.15/metric ton       |
| Average hourly wage       | \$21/h                  |
| Electricity               | \$0.061/kwh             |
| Steam (6 bar)             | \$20/metric ton         |
| Solids disposal cost      | \$22.23/metric          |
| Waste water disposal cost | \$1.30/metric ton       |

60 The operating cost is divided into three classifications as follows: (1) direct  
61 production costs, which mainly involve expenditures for raw materials, direct  
62 operating labor, supervisory and clerical labor directly connected to the  
63 manufacturing operation, utilities, plant maintenance and repairs. Some variable cost  
64 parameters, such as the prices of cotton straw, phenol, and utilities, average hourly

65 wage and water treatment cost, are listed on the Table S3; (2) fixed charges,  
 66 essentially include expenses directly associated with depreciation, property taxes,  
 67 insurance. Some assumptions for the estimation of fixed charges, such as depreciation  
 68 period, type of depreciation and property tax rate, are listed on the Table S4; (3)  
 69 plant-overhead costs, which are used for medical services, warehouses, safety services,  
 70 warehouses and so on. The estimation of fixed charges and plant-overhead costs can  
 71 be based on the method of 'Percentage of total-capital investment'.<sup>7</sup> However the  
 72 estimation of direct production costs is slightly complex. Chemical engineering  
 73 principles, such as material balance and energy balance, and the methodology  
 74 proposed by Overcash et.al are used for calculation of the expenditures for raw  
 75 materials and utilities.<sup>8</sup> The method of estimating labor requirements is based on  
 76 adding up the various principal processing steps on the flow sheet and plant capacity,  
 77 and the cost for direct supervisory and clerical labor averages about 15 percent of the  
 78 cost for operating labor.<sup>1</sup> The method for estimation of the expenditures for plant  
 79 maintenance and repairs is the same as that for estimation of fixed charges.

80 **Table S4** Assumptions for the estimation of the fixed charges

| Item                                 | Value/method  |
|--------------------------------------|---------------|
| Equipment depreciation period        | 20 years      |
| Building depreciation period         | 40 years      |
| Amortization period                  | 5 years       |
| Type of depreciation or amortization | Straight-line |
| Property tax rate                    | 2% of FCI     |
| Insurance rate                       | 1% of FCI     |

81 **1.3 Methodology for estimation of cash flow and IRR**

82 **Table S5** Assumptions or parameters for the calculation of IRR

| Item                                 | Value                                           |
|--------------------------------------|-------------------------------------------------|
| Service life                         | 20 years                                        |
| Construction period                  | 1 years                                         |
| Income tax rate                      | 39%                                             |
| Annual capacity in the first year    | 30%                                             |
| Annual capacity in the second year   | 50%                                             |
| Annual capacity in the third year    | 80%                                             |
| Salvage value at end of service life | Working capital+land+salvage value of buildings |
| Levogluosan                          | 15\$/kg                                         |
| Renewable phenol resin               | 2800\$/metric ton                               |
| Road de-icer                         | 700\$/metric ton                                |

83

84 The 20-year facility IRR is calculated on the basis of a cash flow sheet in order  
 85 to perform a profitability evaluation.<sup>1</sup> The determination or estimation of the market  
 86 prices for the three chemicals is important for calculation of IRR. Levoglucosan is  
 87 advertised for sale at \$1500/kg and \$20~90/kg on the carbosynth's Web site and the  
 88 Alibaba Web site, respectively.<sup>9, 10</sup> The purity of the levoglucosan sold at the  
 89 carbosynth's Web site is 3% higher than that of the levoglucosan produced via the  
 90 process. Moreover, from an economic perspective, mass production will lower the  
 91 cost. Therefore, the price of the levoglucosan produced via the process is set at \$15/kg  
 92 in this analysis. The phenolic resins from America are priced around \$4000/ton  
 93 (¥25.5/kg) on the Guidechem Web site.<sup>11</sup> Considering that about 50wt% of the phenol  
 94 used in the renewable phenol resin produced via the process is replaced and the  
 95 phenolic resin is not as good as those phenolic resins based on petrochemical  
 96 synthesis in quality and performance, the renewable phenol resin was valued at  
 97 \$2800/ton. Food grade calcium acetate is priced at about \$1200/ton on the Alibaba  
 98 Web site.<sup>12</sup> The deicer produced via the process is, at best, an industrial grade mixture  
 99 of calcium salts. Hence the mixture is pegged at \$700/ton. Some necessary parameters  
 100 for the calculation of the cash flow sheet, such as construction period, income tax rate  
 101 and product prices, are showed in Table S5.

102 Moreover, the cash flow sheet also involves so-called general expenses. The  
 103 general expenses, including research and development, administrative, distribution,  
 104 marketing expenses etc, are estimated at about 4% of the operating costs per year.<sup>8</sup>  
 105 The cash flow sheet is listed in Table S6.

106

**Table S6** The cash flow sheet

| Year | Annual capacity | Cash flow     |
|------|-----------------|---------------|
| 0    | 0               | -\$26,240,599 |
| 1    | 30%             | -\$12,199,189 |
| 2    | 50%             | \$2,381,781   |
| 3    | 80%             | \$13,413,186  |
| 4    | 100%            | \$15,232,873  |
| 5    | 100%            | \$15,232,873  |
| 6    | 100%            | \$20,350,000  |
| 7    | 100%            | \$20,350,000  |
| 8    | 100%            | \$20,350,000  |
| 9    | 100%            | \$20,350,000  |
| 10   | 100%            | \$20,350,000  |
| 11   | 100%            | \$20,350,000  |
| 12   | 100%            | \$20,350,000  |
| 13   | 100%            | \$20,350,000  |
| 14   | 100%            | \$20,350,000  |
| 15   | 100%            | \$20,350,000  |
| 16   | 100%            | \$20,350,000  |

|    |      |              |
|----|------|--------------|
| 17 | 100% | \$20,350,000 |
| 18 | 100% | \$20,350,000 |
| 19 | 100% | \$20,350,000 |
| 20 | 100% | \$26,701,958 |

#### 107 1.4 The average delivery distance

108 Since the biorefinery plant is located at the center of a square rural area, where  
 109 cotton straw is uniformly distributed, the distance traveled by a truck delivering the  
 110 cotton straw is uncertain and should be a random variable. Therefore, the average  
 111 transportation distance to this plant, namely the random variable expectation, will be  
 112 supposed to be the actual distance traveled by trucks delivering all the cotton straw. A  
 113 formula of computation of the average delivery distance was given by Brown et al,  
 114 but the deduced method and details of this formula was not provided.<sup>13</sup> We give a  
 115 following deduced method and steps of this formula.

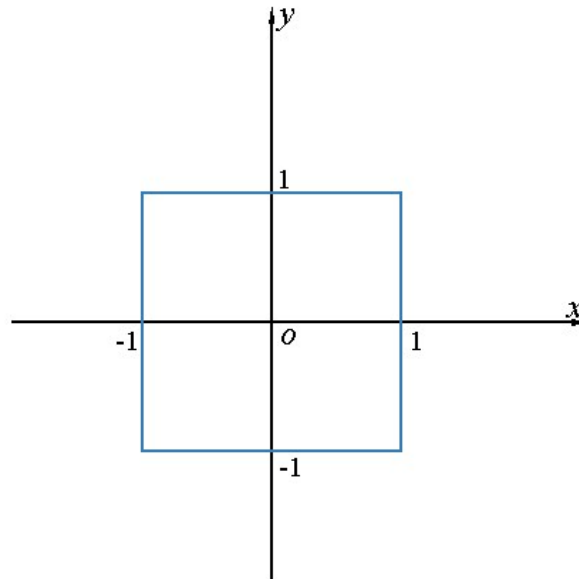

131 **Fig. S1** A square with a side of length 2

132 Firstly, if F is the feedstock delivered annually to the plant, Y is the annual yield  
 133 of cotton straw and f is the fraction of the acreage around the plant devoted to  
 134 feedstock production, the square rural area should have a side of length  $(F/(Y*f))^{0.5}$ .  
 135 Suppose that the average distance from a random point in the square to the center of  
 136 the square is  $r_{ave}$  if the horizontal and vertical ordinate of the point all follow U (-1, 1).

137 Secondly, a square with a side of length 2 is considered as depicted in Fig. S1.

138 The average distance from a random point in the square to the center of the  
 139 square (I) can be calculated as following if the horizontal and vertical ordinate of the  
 140 point all follow U (-1, 1):

$$141 \quad I = \int_{-1}^1 \int_{-1}^1 \sqrt{x^2 + y^2} * \frac{1}{2} * \frac{1}{2} dx dy = \int_0^1 \int_0^1 \sqrt{x^2 + y^2} dx dy$$

$$142 \quad \text{Let : } x = r \cos \varphi, y = r \sin \varphi$$

143 So :

$$144 \quad I = \int_0^{\frac{\pi}{4}} d\varphi \int_0^{\sec \varphi} r^2 dr + \int_{\frac{\pi}{4}}^{\frac{\pi}{2}} d\varphi \int_0^{\csc \varphi} r^2 dr$$

$$I = \frac{1}{3}(\sqrt{2} + Ln(1 + \sqrt{2}))$$



145

146

147

148

149

150 Finally, the two squares are similar.

151

$$Q \frac{r_{ave}}{I} = \frac{\sqrt{\frac{F}{Yf}}}{2}$$

$$\therefore r_{ave} = \frac{1}{6} \sqrt{\frac{F}{Yf}} (\sqrt{2} + Ln(1 + \sqrt{2}))$$

152

153

154

155

156

157 A ‘tortuosity factor’  $\tau$  is defined as the ratio of actual distance to the straight-line  
158 distance from the plant. Therefore, the average delivery distance, which is expressed  
159 as  $r_{square}$  in this following formula, should be:

160

$$r_{square} = \frac{1}{6} \tau \sqrt{\frac{F}{Yf}} (\sqrt{2} + Ln(1 + \sqrt{2}))$$

161

162

163 In this study, F, Y, f and  $\tau$  are assumed to be 18000 ton/year, 5 ton/acre per year,  
164 60% and 1.5, respectively. Therefore, the average delivery distance is 1.76 miles.

## 165 2 Investment and production cost

### 166 2.1 The investment

167

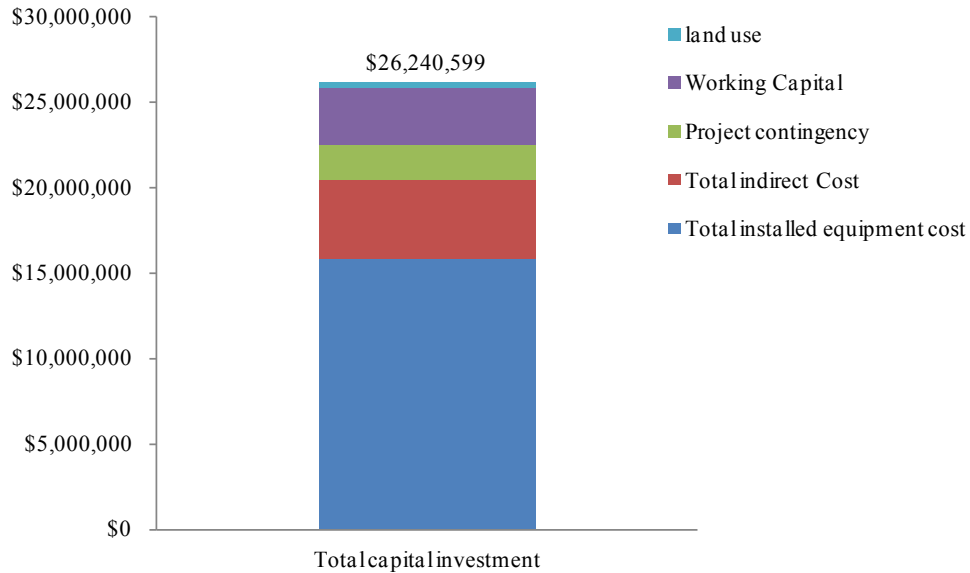

168

169

170

171

172

173

174

175

176

177

178

179

180

181

182 **Fig. S2** Total capital investment of the process

183

184 As showed in Fig. S2, which represents total capital investment as the  
185 summation of total installed equipment cost, total indirect cost, project contingency,

186 working capital cost, and land use, the total capital investment for the biorefinery  
187 process amounts to \$26.2 million, while the total installed equipment cost of the  
188 whole process is \$15.7 million. Such a scale of investment is one order smaller than  
189 the investment scale of biofuel plants.<sup>5, 14, 15</sup> However, Chemicals have normally  
190 higher added value than fuels. And this allows chemical plants can be operated with  
191 smaller scale of economies than fuel plants when the two kinds of plants have the  
192 same profit margin. Since the biorefinery process consists of four sub-processes, it is  
193 important to know the percentage of the total installed equipment cost for each sub-  
194 process.

195 Fig. S3 shows the relative weightings (percentage) of the four sub-processes  
196 represented in the total installed equipment cost of the whole process. Bio-oil  
197 preparation and separation (sub 1), extraction of levoglucosan (sub 2) and preparation  
198 of deicer (sub 4) separately contribute 38%, 34% and 25% of the total installed  
199 equipment cost, respectively. The really amazing thing about this figure is that  
200 production of renewable phenol resin (sub 3) is the smallest (only 3%) contributor to  
201 the total installed equipment cost. The reason is that the production of renewable  
202 phenol resin requires a minimum number of unit operations or equipments in  
203 comparison with other three sub-processes. From an economic point of view, the sub-  
204 process 4, the preparation of deicer, seemingly is not feasible or cost-effective  
205 because the total installed cost for the sub-process 4 accounts for 25% of the total but  
206 the selling price (\$700/ton) and the production rate (37kg/h) of the deicer are all  
207 comparatively low. On the other hand, it can be expected that the extraction of  
208 levoglucosan and the production of renewable phenol resin are all cost-effective  
209 because levoglucosan is a high added-value product and the production of renewable  
210 phenol resin needs relatively small equipment investment.

211

212

213

214

215

216

217

218

219

220

221

222

223

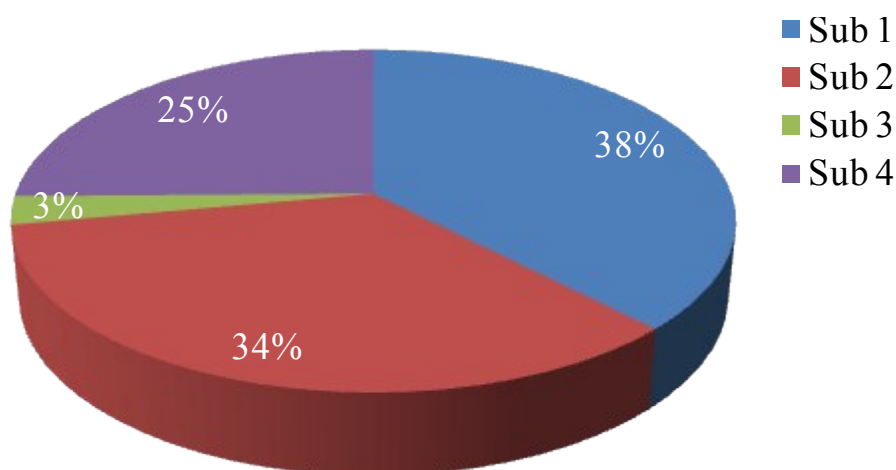

224 **Fig. S3** The percentage of the total installed equipment cost for each sub-process

## 225 2.2 The production cost

226 Determination of the necessary capital investment is only one part of a complete

227 cost estimate. Another equally important part is the estimation of costs for operating  
 228 the plant or process. Fig. S4 shows the annual direct production costs for cotton straw  
 229 to levoglucosan, renewable phenol resin and deicer. Similar to Fig. S3, the direct  
 230 production cost of the whole process is breakdown to each sub-process area in Fig. S4.  
 231

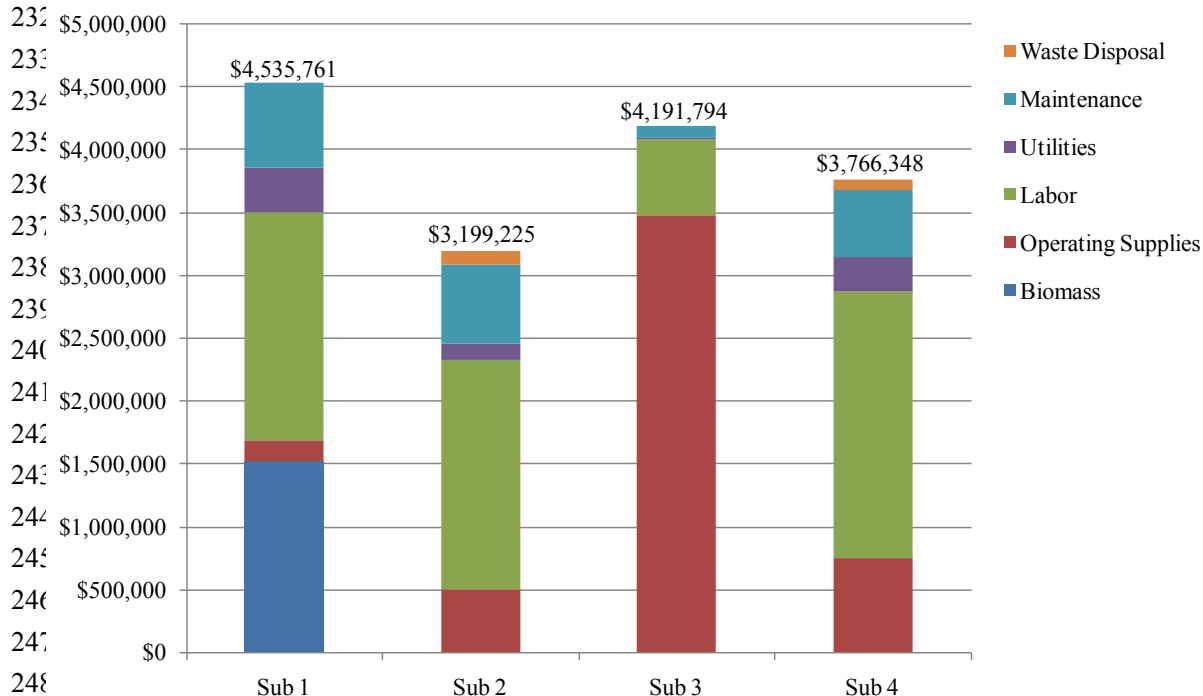

249 **Fig. S4** The annual direct production costs

250 The direct production costs of the four sub-processes vary from around \$3.2  
 251 million/year to \$4.5 million/year, and total up to \$15.7 million/year. There is not  
 252 much difference between the annual direct production cost of sub 4 (preparation of  
 253 deicer) and the annual direct production cost of sub 2 (extraction of levoglucosan) or  
 254 sub 3 (production of renewable phenol resin). However, in consideration of the yearly  
 255 outputs and product prices of the three chemicals, it can be also inferred that sub 4  
 256 (preparation of deicer) is not cost-effective. The labor costs of sub 1 (bio-oil  
 257 preparation and separation), 2 (extraction of levoglucosan) and 4 (preparation of  
 258 deicer) are the largest contributors to the annual direct production costs of the three  
 259 sub-processes, respectively. This is because each of the three sub-processes contains  
 260 quite a number of unit operations or equipments, which require a number of operating  
 261 labor and a certain amount of direct supervisory and clerical labor for operation. On  
 262 the basis of the same reason, the maintenance costs of the three sub-processes account  
 263 for the certain proportion of the annual direct production costs of the three sub-  
 264 processes. The operating supplies of sub 3 (production of renewable phenol resin)  
 265 comprise the vast majority of the annual direct production cost of this sub-process  
 266 because a substantial number of phenol and formaldehyde are used in the sub-process.  
 267 Direct production cost is only part of operating cost. The operating cost includes all  
 268 expenses directly connected with the manufacturing operation or the physical  
 269 equipment of a process plant itself. However, unlike direct production cost, operating

270 cost is not appropriate for being breakdown to process area because it includes plant-  
 271 overhead costs, which are reserved for hospital and medical services, safety services,  
 272 salvage services and warehouse facilities, etc.

273 As shown in Fig. S5, the operating cost of the whole process is around \$22.2  
 274 million/year. The annual direct production cost, fixed charge and plant-overhead cost  
 275 of the whole process account for about 71%, 12% and 17% of the operating cost,  
 276 respectively. These percents are basically similar to other techno-economic analyses  
 277 of some biorefinery processes via fast paralysis.<sup>5, 6</sup> However, the labor cost of the  
 278 whole process occupies about 29% of the operating cost; In comparison with  
 279 production of biofuels,<sup>5, 6, 15</sup> this percent is remarkably higher. There could be three  
 280 reasons to explain this. Firstly, production of chemicals usually needs more  
 281 purification steps or equipments than production of fuels. Secondly, not one chemical  
 282 but three chemicals are produced in this birefinery process. Finally, mass production  
 283 of biofuels usually is a continuous process, while the production of the three  
 284 chemicals contains some batch steps. These reasons could result in more labor  
 285 requirement in this birefinery process.

286

287

288

289

290

291

292

293

294

295

296

297

298

299

300

301

302

303

304

305

306

307

308

309

310

311

312

313

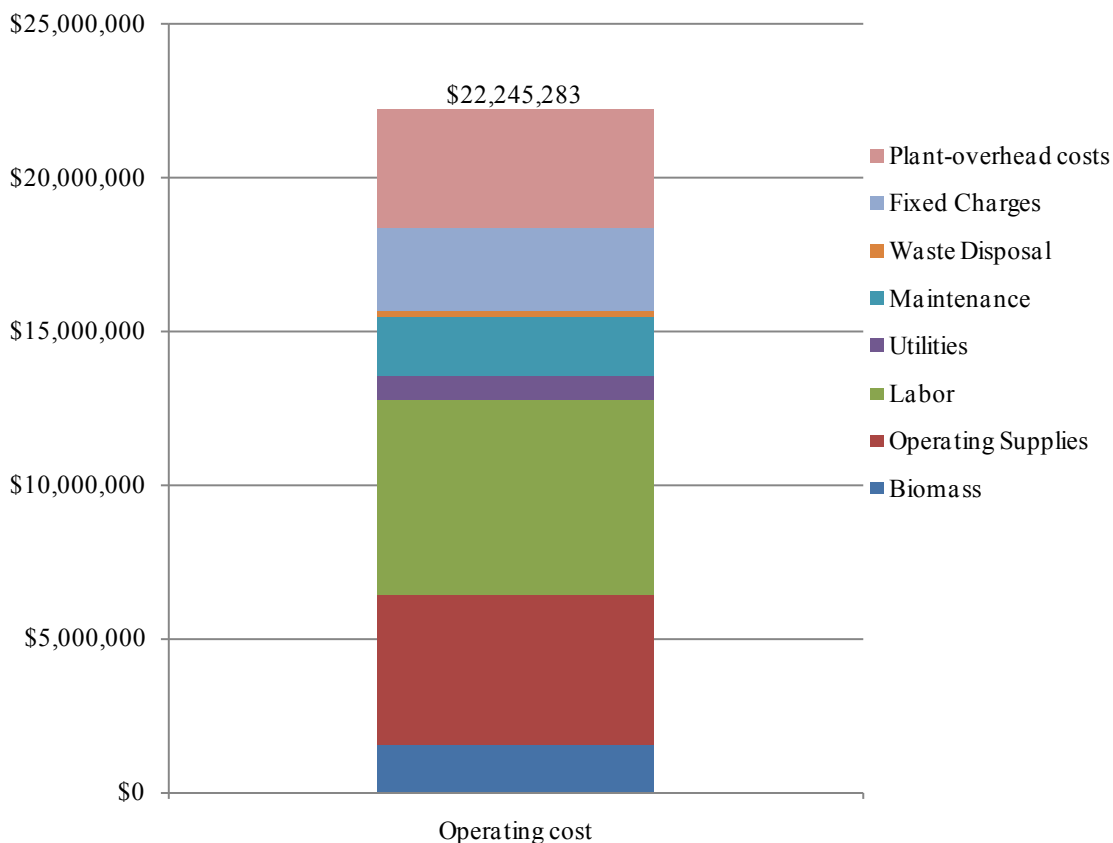

**Fig. S5** The operating cost of the whole process

314  
315  
316

### 317 **3 Some background data for this LCA study**

#### 318 **3.1 LCI data for petrochemical production of phenol - formaldehyde resins (PF)**

319 Wilson et al. has developed an life-cycle inventory of formaldehyde-base resins  
320 used in wood composites in terms of resources, emissions, energy and carbon.<sup>16</sup> The  
321 LCI for the production of PF is shown in Table S7, in which the environmental  
322 burdens of the delivery of chemicals to the resin plants are ignored.

323 **Table S7** LCI data for conventional PF production route

| Materials, Energy and Emissions | Value    | Units                             |
|---------------------------------|----------|-----------------------------------|
| Phenol                          | 2.44E-01 | kg /kg <sub>PF</sub>              |
| Methanol                        | 2.09E-01 | kg /kg <sub>PF</sub>              |
| Sodium hydroxide                | 6.10E-02 | kg /kg <sub>PF</sub>              |
| Process water                   | 3.34E-01 | kg /kg <sub>PF</sub>              |
| Cooling water from river (20°C) | 1.56E-02 | kg /kg <sub>PF</sub>              |
| Electricity                     | 3.56E-02 | kWh /kg <sub>PF</sub>             |
| Natural gas                     | 8.21E-03 | Nm <sup>3</sup> /kg <sub>PF</sub> |
| Propane                         | 2.93E-06 | L /kg <sub>PF</sub>               |
| Carbon dioxide                  | 1.76E-02 | kg /kg <sub>PF</sub>              |
| Carbon monoxide                 | 3.81E-05 | kg /kg <sub>PF</sub>              |

#### 324 **3.2 LCI data for petrochemical production of calcium acetate**

325 Overcash et al has presented gate-to-gate process energy use for a calcium  
326 acetate manufacturing process, in which calcium hydroxide and acetic acid were used  
327 as raw materials.<sup>17</sup> On the basis of the work of Overcash et al, LCI data for  
328 petrochemical production of calcium acetate is shown in Table S8.

329 **Table S8** LCI data for petrochemical production of calcium acetate

| Materials, Energy and Emissions | Value    | Units                             |
|---------------------------------|----------|-----------------------------------|
| Calcium hydroxide               | 4.69E-01 | kg /kg <sub>Calcium acetate</sub> |
| Acetic acid                     | 7.59E-01 | kg /kg <sub>Calcium acetate</sub> |
| Steam (6bar)                    | 1.53E+00 | MJ /kg <sub>Calcium acetate</sub> |
| Electricity                     | 1.05E-03 | MJ /kg <sub>Calcium acetate</sub> |
| Natural gas                     | 9.32E-01 | MJ /kg <sub>Calcium acetate</sub> |
| Carbon dioxide                  | 5.22E-02 | kg /kg <sub>Calcium acetate</sub> |

330 **3.3 The GWP100a, CED, EI-99 metric for some chemicals and utilities**

331 Cradle-to-gate LCIA results according to the GWP100a, CED, EI-99 metric for  
 332 some chemicals and utilities used in this process are listed in Table S9. All the data is  
 333 mainly based on ecoinvent 2.2 database, and a few of the data is derived from some  
 334 LCA documents. These LCA documents are listed in the last row in Table S9.

335 **Table S9** The GWP100a, CED, EI-99 metric for some chemicals and utilities

| Substance                           | GWP100a<br>(kg <sub>CO2-eq</sub> /kg) | CED <sub>non-renewable</sub><br>(MJ <sub>eq</sub> /kg) | EI-99<br>(Points/kg) |
|-------------------------------------|---------------------------------------|--------------------------------------------------------|----------------------|
| <i>Materials</i>                    |                                       |                                                        |                      |
| <b>Fertilizer<sup>a</sup></b>       | <b>1.66E+00</b>                       | <b>2.93E+01</b>                                        | <b>1.66E-01</b>      |
| Sulfuric acid (98 wt. %)            | 1.20E-01                              | 2.02E+00                                               | 4.00E-02             |
| Process water                       | 2.45E-05                              | 2.79E-04                                               | 1.83E-06             |
| Activated carbon <sup>b</sup>       | 2.94E-01                              | 5.92E+00                                               | 1.76E-02             |
| Calcium hydroxide                   | 9.90E-01                              | 5.50E+00                                               | 3.00E-02             |
| Hydrochloric acid (32 wt. %)        | 8.53E-01                              | 1.75E+01                                               | 6.00E-02             |
| Ethyl acetate <sup>c</sup>          | 3.14E+00                              | 9.63E+01                                               | 3.36E-01             |
| Sodium hydroxide                    | 1.10E+00                              | 2.14E+01                                               | 6.00E-01             |
| Phenol                              | 3.48E+00                              | 1.21E+02                                               | 4.40E-01             |
| Formaldehyde (37 wt.%) <sup>c</sup> | 4.14E-01                              | 1.82E+01                                               | 6.25E-02             |
| Calcium oxide <sup>d</sup>          | 1.31E+00                              | 7.30E+00                                               | 2.80E-02             |
| Methanol <sup>c</sup>               | 7.64E-01                              | 4.08E+01                                               | 1.35E-01             |
| <i>Energy</i>                       |                                       |                                                        |                      |
| Diesel <sup>e</sup>                 | 1.29E-02                              | 1.20E+00                                               | 6.43E-03             |
| Electricity <sup>e</sup>            | 4.90E-01                              | 9.87E+00                                               | 2.00E-02             |
| Steam (6 bar) <sup>e</sup>          | 1.00E-01                              | 1.56E+00                                               | 5.77E-03             |
| Cooling water from river<br>(20°C)  | 0.00E+00                              | 0.00E+00                                               | 0.00E+00             |
| <i>Waste treatment</i>              |                                       |                                                        |                      |
| Waste liquid <sup>f</sup>           | 2.19E-02                              | 2.42E-01                                               | 5.00E-04             |
| Solid waste <sup>f</sup>            | 1.34E-02                              | 6.52E-01                                               | 4.22E-02             |

336

337 <sup>a</sup> Values based on the work of Hasler et al.<sup>18</sup>

338 <sup>b</sup> Values based on the work of Arena et al.<sup>19</sup>

339 <sup>c</sup> Values based on the work of Amelio et al.<sup>20</sup>

340 <sup>d</sup> Values based on the works of Huijbregts et al. and Alvarez-Gaitan et al.<sup>21, 22</sup>

341 <sup>e</sup> Functional unit for diesel as well as steam is MJ and for electricity kWh

342 <sup>f</sup> Values based on the works of Rerat et al.<sup>23</sup>

343 **Electronic Supplementary Information (ESI)**

344 **Life cycle assessment and techno-economic analysis of the utilization**  
345 **of bio-oil components for the production of three chemicals**

346 Ji-Lu Zheng <sup>a</sup>, Ya-Hong Zhu <sup>a</sup>, Ming-Qiang Zhu <sup>a\*</sup>, Guo-Tao Sun <sup>a</sup>, Run-Cang Sun <sup>b</sup>

347 <sup>a</sup> *Key Laboratory of Exploitation and Utilization of Economic Plant Resources in*  
348 *Shaanxi Province, Western Scientific Observation and Experiment Station of*  
349 *Development and Utilization of Rural Renewable Energy of Ministry of*  
350 *Agriculture, Northwest A&F University, Yangling 712100, China.*

351 <sup>b</sup> *Beijing Key Laboratory of Lignocellulosic Chemistry, Beijing Forestry University,*  
352 *Beijing, China.*

353

354

355

356

357

358

359 \*Corresponding authors. Address: Northwest A&F University, 712100, Yangling,  
360 China. Tel.: +86-029-87082230; Fax: +86-029-87082216.

361 E-mail address: zmqsx@nwsuaf.edu.cn (M. Q. Zhu).

## 363 Contents

|     |     |                                                                                         |    |
|-----|-----|-----------------------------------------------------------------------------------------|----|
| 364 | 1   | The procedures of the techno-economic-environmental analysis.....                       | 2  |
| 365 | 1.1 | Methodology for estimation of the total-capital investment.....                         | 2  |
| 366 | 1.2 | Methodology for estimation of the operating cost and direct production cost .....       | 4  |
| 367 | 1.3 | Methodology for estimation of the operating cost and direct production cost .....       | 5  |
| 368 | 1.4 | The average delivery distance.....                                                      | 6  |
| 369 | 2   | Investment and production cost .....                                                    | 8  |
| 370 | 2.1 | <i>The investment</i> .....                                                             | 8  |
| 371 | 2.2 | <i>The production cost</i> .....                                                        | 9  |
| 372 | 3   | Some background data for this LCA study.....                                            | 11 |
| 373 | 3.1 | <i>LCI data for petrochemical production of phenol - formaldehyde resins (PF)</i> ..... | 11 |
| 374 | 3.2 | <i>LCI data for petrochemical production of calcium acetate</i> .....                   | 11 |
| 375 | 3.3 | <i>The GWP100a, CED, EI-99 metric for some chemicals and utilities</i> .....            | 12 |



## 377 4 The procedures of the techno-economic-environmental analysis

### 378 4.1 Methodology for estimation of the total-capital investment

379 **Table S1** Methodology for total-capital investment for nth plant

| Item                                         | Percent of TDEC |
|----------------------------------------------|-----------------|
| Total purchased equipment-delivered cost     | 100%            |
| Purchased equipment installation             | 39%             |
| Instrumentation and controls (installed)     | 13%             |
| Piping (installed)                           | 31%             |
| Electrical systems (installed)               | 10%             |
| Buildings (including services)               | 29%             |
| Yard improvements                            | 10%             |
| Service facilities (installed)               | 55%             |
| Total installed cost (TIC)                   | 287%            |
| Land (if purchase is required)               | 6%              |
| Engineering and supervision                  | 32%             |
| Construction expenses                        | 34%             |
| Total direct and indirect plant costs (TDIC) | 359%            |
| Contractor's fee (CF)                        | 5% of TDIC      |
| Contingency (CO)                             | 10% of TDIC     |
| Fixed-capital investment (FCI)               | TDIC+CF+CO      |
| Working capital                              | 15% of FCI      |
| Total capital investment                     | 475%            |

380

381 The total installed equipment cost is part of the total capital investment. The total  
382 capital investment for all processes consists of fixed-capital investment for physical  
383 equipment and facilities in the plant plus working capital which must be available to  
384 pay salaries, keep raw materials and products on hand, and handle other special items  
385 requiring a direct cash outlay. This method for estimating the total-capital investment  
386 is based on the percentage of delivered-equipment cost. Namely, the determination of  
387 the delivered-equipment cost is required firstly. The other items included in the fixed-  
388 capital investment are estimated as percentages of the delivered-equipment cost , and  
389 the working capital amounts to 15 percent of the fixed-capital investment.<sup>1</sup> The items  
390 included in the total-capital investment and the corresponding ratio factors based on  
391 delivered equipment cost are listed in Table S1. Unit process principles are used to  
392 determine the equipment specifications,<sup>1, 2</sup> and then the delivered-equipment cost of  
393 each piece of the process equipments can be estimated from appropriate  
394 manufacturers' bulletins, published cost data, empirical rules<sup>1-3</sup> or e-commerce  
395 websites (such as Alibaba) as listed in Table S2.

**Table S2** The delivered-equipment cost of each piece of the process equipments

| Equipments                   | Specification                                 | Delivered-equipment cost |
|------------------------------|-----------------------------------------------|--------------------------|
| <i>Sub 1</i>                 |                                               |                          |
| Chopper                      | 50 kw/ton                                     | \$44,137                 |
| Biomass Chopping Screen      | 60 ton/day                                    | \$3,286                  |
| Grinding Hammer Mill         | 50 kw/ton                                     | \$44,137                 |
| Biomass Grinding Screen      | 60 ton/day                                    | \$3,359                  |
| Belt Press                   | 5.5 kw                                        | \$19,425                 |
| Bale Moving Forklift*4       | 1.25 ton/h                                    | \$14,021                 |
| Concrete Storage Slab        | 30 m*29 m*3.5 m                               | \$87,631                 |
| Discharge Conveyor           | 0.75 kw/ton                                   | \$9,785                  |
| Bale Transport Conveyor      | 90 w/ton                                      | \$77,845                 |
| Bale Unwrapping Conveyor     | 5.5 kw                                        | \$29,210                 |
| Continuous Spray Rotary Drum | 2.2 kw, 2.5 ton/h                             | \$185,089                |
| Rotary Dryer                 | 2.2 kw                                        | \$99,519                 |
| Biomass Feeding Bin          | Φ1.5*4.3 m                                    | \$6,047                  |
| Screw Feeder                 | 0.75 kw/ton                                   | \$23,733                 |
| Pyrolysis Fluid Bed          | Φ1.2 m*2 m                                    | \$122,099                |
| Non-condensable Gas Blower   | 90 kw                                         | \$31,357                 |
| Pyrolysis Vapor Cyclones*2   | 3600 m <sup>3</sup> of gas per hour           | \$184,316                |
| Bio-oil Condenser*2          | 600 m <sup>2</sup> of heat transfer area      | \$291,722                |
| Electro-Static Precipitator  | 30 kw                                         | \$42,705                 |
| Condenser Water Pump*3       | 90 kw                                         | \$62,527                 |
| Ice making machine           | 53 /kw, 592 kg of ice per hour                | \$20,000                 |
| Condenser Oil Pump           | 5 kw                                          | \$6,952                  |
| Cooling Tower                | Φ 8.8m*6.5m                                   | \$438,898                |
| Wash Percolater              | 4 m <sup>3</sup>                              | \$31,459                 |
| Solids Combustor             | Φ0.3 m*0.8 m                                  | \$35,680                 |
| Combustor Cyclones           | 3360 m <sup>3</sup> of gas per hour           | \$161,343                |
| Combustion Gas Blower        | 85 kw                                         | \$9,084                  |
| <i>Sub 2</i>                 |                                               |                          |
| Settling Tank                | 3 m <sup>3</sup>                              | \$35,965                 |
| Filter, vacuum rotary drum   | 3 kw, 600 kg of filtrate /(m <sup>2</sup> .h) | \$185,089                |
| Vacuum pump                  | 10 kw                                         | \$28,655                 |
| Settling Tank                | 3 m <sup>3</sup>                              | \$35,965                 |
| Filter, vacuum rotary drum   | 3 kw, 600 kg of filtrate /(m <sup>2</sup> .h) | \$185,089                |
| Vacuum pump                  | 10 kw                                         | \$28,655                 |
| Mixer                        | 10 kw, 3m <sup>3</sup>                        | \$73,805                 |
| Vacuum freeze dryer          | 130 kw, 1.2 ton water per hour                | \$365,261                |
| Mixer                        | 10 kw, 3 m <sup>3</sup>                       | \$73,805                 |
| Filter, vacuum rotary drum   | 3 kw, 600 kg of filtrate /(m <sup>2</sup> .h) | \$185,089                |
| Evaporation crystallizer     | 1000 kg of acetic ether per                   | \$452,879                |
| Settling Tank                | 3 m <sup>3</sup>                              | \$35,965                 |

|                              |                                               |           |
|------------------------------|-----------------------------------------------|-----------|
| Filter, vacuum rotary drum   | 3 kw, 600 kg of filtrate /(m <sup>2</sup> .h) | \$185,089 |
| Vacuum pump                  | 10 kw                                         | \$28,655  |
| <i>Sub 3</i>                 |                                               |           |
| Mixer*2                      | 10 kw, 3 m <sup>3</sup>                       | \$147,610 |
| <i>Sub 4</i>                 |                                               |           |
| Evaporator                   | 600 kg of water per hour                      | \$349,285 |
| Mixer                        | 10 kw, 3 m <sup>3</sup>                       | \$73,805  |
| Evaporator                   | 600 kg of water per hour                      | \$349,285 |
| Mixer*4                      | 3 kw, 0.8 m <sup>3</sup>                      | \$104,268 |
| Filter, vacuum rotary drum*4 | 3 kw, 75 kg of filtrate /(m <sup>2</sup> .h)  | \$212,611 |
| Vacuum pump*4                | 10 kw                                         | \$114,620 |
| Evaporator*2                 | 50 kg of methanol per hour                    | \$190,110 |

397 **4.2 Methodology for estimation of the operating cost and direct production**  
398 **cost**

399 **Table S3** Variable costs employed in the estimation of the direct production costs

400 (Source: www.alibaba.com and refs). <sup>6-8</sup>

| Item                      | Value             |
|---------------------------|-------------------|
| Cotton straw              | \$83/metric ton   |
| Transport                 | \$0.71/(ton.mile) |
| Sulfuric acid 98 wt.%     | \$300/metric ton  |
| Process water             | \$1.0/metric ton  |
| Activated carbon          | \$1500/metric ton |
| Calcium hydroxide         | \$110/metric ton  |
| Hydrochloric acid 32 wt.% | \$190/metric ton  |
| Ethyl acetate             | \$1200/metric ton |
| Calcium oxide             | \$160/metric ton  |
| Methanol                  | \$700/metric ton  |
| Sodium hydroxide          | \$500/metric ton  |
| Phenol                    | \$1300/metric ton |
| Formaldehyde 37 wt.%      | \$400/metric ton  |
| Cooling water from river  | \$0.15/metric ton |
| Average hourly wage       | \$21/h            |
| Electricity               | \$0.061/kwh       |
| Steam (6 bar)             | \$20/metric ton   |
| Solids disposal cost      | \$22.23/metric    |
| Waste water disposal cost | \$1.30/metric ton |

401 The operating cost is divided into three classifications as follows: (1) direct  
402 production costs, which mainly involve expenditures for raw materials, direct  
403 operating labor, supervisory and clerical labor directly connected to the  
404 manufacturing operation, utilities, plant maintenance and repairs. Some variable cost  
405 parameters, such as the prices of cotton straw, phenol, and utilities, average hourly

406 wage and water treatment cost, are listed on the Table S3; (2) fixed charges,  
 407 essentially include expenses directly associated with depreciation, property taxes,  
 408 insurance. Some assumptions for the estimation of fixed charges, such as depreciation  
 409 period, type of depreciation and property tax rate, are listed on the Table S4; (3)  
 410 plant-overhead costs, which are used for medical services, warehouses, safety services,  
 411 warehouses and so on. The estimation of fixed charges and plant-overhead costs can  
 412 be based on the method of 'Percentage of total-capital investment'.<sup>4</sup> However the  
 413 estimation of direct production costs is slightly complex. Chemical engineering  
 414 principles, such as material balance and energy balance, and the methodology  
 415 proposed by Overcash et.al are used for calculation of the expenditures for raw  
 416 materials and utilities.<sup>5</sup> The method of estimating labor requirements is based on  
 417 adding up the various principal processing steps on the flow sheet and plant capacity,  
 418 and the cost for direct supervisory and clerical labor averages about 15 percent of the  
 419 cost for operating labor.<sup>1</sup> The method for estimation of the expenditures for plant  
 420 maintenance and repairs is the same as that for estimation of fixed charges.

421 **Table S4** Assumptions for the estimation of the fixed charges

| Item                                 | Value/method  |
|--------------------------------------|---------------|
| Equipment depreciation period        | 20 years      |
| Building depreciation period         | 40 years      |
| Amortization period                  | 5 years       |
| Type of depreciation or amortization | Straight-line |
| Property tax rate                    | 2% of FCI     |
| Insurance rate                       | 1% of FCI     |

422 **4.3 Methodology for estimation of the operating cost and direct production cost**

423 **Table S5** Assumptions or parameters for the calculation of IRR

| Item                                 | Value                                           |
|--------------------------------------|-------------------------------------------------|
| Service life                         | 20 years                                        |
| Construction period                  | 1 years                                         |
| Income tax rate                      | 39%                                             |
| Annual capacity in the first year    | 30%                                             |
| Annual capacity in the second year   | 50%                                             |
| Annual capacity in the third year    | 80%                                             |
| Salvage value at end of service life | Working capital+land+salvage value of buildings |
| Levogluconan                         | 15\$/kg                                         |
| Renewable phenol resin               | 2800\$/metric ton                               |
| Road de-icer                         | 700\$/metric ton                                |

424

425 The 20-year facility IRR is calculated on the basis of a cash flow sheet in order  
 426 to perform a profitability evaluation.<sup>1</sup> The determination or estimation of the market  
 427 prices for the three chemicals is important for calculation of IRR. Levoglucosan is  
 428 advertised for sale at \$1500/kg and \$20~90/kg on the carbosynth's Web site and the  
 429 Alibaba Web site, respectively.<sup>9, 10</sup> The purity of the levoglucosan sold at the  
 430 carbosynth's Web site is 3% higher than that of the levoglucosan produced via the  
 431 process. Moreover, from an economic perspective, mass production will lower the  
 432 cost. Therefore, the price of the levoglucosan produced via the process is set at \$15/kg  
 433 in this analysis. The phenolic resins from America are priced around \$4000/ton  
 434 (¥25.5/kg) on the Guidechem Web site.<sup>11</sup> Considering that about 50wt% of the phenol  
 435 used in the renewable phenol resin produced via the process is replaced and the  
 436 phenolic resin is not as good as those phenolic resins based on petrochemical  
 437 synthesis in quality and performance, the renewable phenol resin was valued at  
 438 \$2800/ton. Food grade calcium acetate is priced at about \$1200/ton on the Alibaba  
 439 Web site.<sup>12</sup> The deicer produced via the process is, at best, an industrial grade mixture  
 440 of calcium salts. Hence the mixture is pegged at \$700/ton. Some necessary parameters  
 441 for the calculation of the cash flow sheet, such as construction period, income tax rate  
 442 and product prices, are showed in Table S5.

443 Moreover, the cash flow sheet also involves so-called general expenses. The  
 444 general expenses, including research and development, administrative, distribution,  
 445 marketing expenses etc, are estimated at about 4% of the operating costs per year.<sup>5</sup>  
 446 The cash flow sheet is listed in Table S6.

447

**Table S6** The cash flow sheet

| Year | Annual capacity | Cash flow     |
|------|-----------------|---------------|
| 0    | 0               | -\$26,240,599 |
| 1    | 30%             | -\$12,199,189 |
| 2    | 50%             | \$2,381,781   |
| 3    | 80%             | \$13,413,186  |
| 4    | 100%            | \$15,232,873  |
| 5    | 100%            | \$15,232,873  |
| 6    | 100%            | \$20,350,000  |
| 7    | 100%            | \$20,350,000  |
| 8    | 100%            | \$20,350,000  |
| 9    | 100%            | \$20,350,000  |
| 10   | 100%            | \$20,350,000  |
| 11   | 100%            | \$20,350,000  |
| 12   | 100%            | \$20,350,000  |
| 13   | 100%            | \$20,350,000  |
| 14   | 100%            | \$20,350,000  |
| 15   | 100%            | \$20,350,000  |
| 16   | 100%            | \$20,350,000  |

|    |      |              |
|----|------|--------------|
| 17 | 100% | \$20,350,000 |
| 18 | 100% | \$20,350,000 |
| 19 | 100% | \$20,350,000 |
| 20 | 100% | \$26,701,958 |

#### 448 4.4 The average delivery distance

449 Since the biorefinery plant is located at the center of a square rural area, where  
450 cotton straw is uniformly distributed, the distance traveled by a truck delivering the  
451 cotton straw is uncertain and should be a random variable. Therefore, the average  
452 transportation distance to this plant, namely the random variable expectation, will be  
453 supposed to be the actual distance traveled by trucks delivering all the cotton straw. A  
454 formula of computation of the average delivery distance was given by Brown et al,  
455 but the deduced method and details of this formula was not provided.<sup>13</sup> We give a  
456 following deduced method and steps of this formula.

457  
458  
459  
460  
461  
462  
463  
464  
465  
466  
467  
468  
469  
470  
471

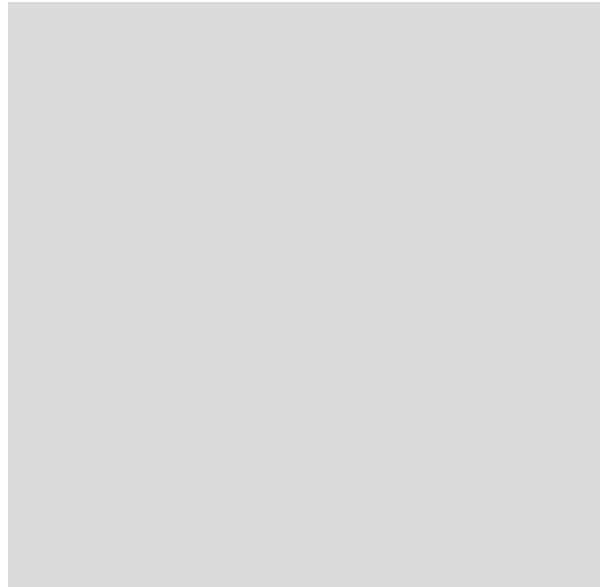

472 **Fig. S1** A square with a side of length 2

473 Firstly, if F is the feedstock delivered annually to the plant, Y is the annual yield  
474 of cotton straw and f is the fraction of the acreage around the plant devoted to  
475 feedstock production, the square rural area should have a side of length  $(F/(Y*f))^{0.5}$ .  
476 Suppose that the average distance from a random point in the square to the center of  
477 the square is  $r_{ave}$  if the horizontal and vertical ordinate of the point all follow U (-1, 1).

478 Secondly, a square with a side of length 2 is considered as depicted in Fig. S1.

479 The average distance from a random point in the square to the center of the  
480 square (I) can be calculated as following if the horizontal and vertical ordinate of the  
481 point all follow U (-1, 1):

482  
483  
484  
485

$$I = \int_{-1}^1 \int_{-1}^1 \sqrt{x^2 + y^2} * \frac{1}{2} * \frac{1}{2} dx dy = \int_0^1 \int_0^1 \sqrt{x^2 + y^2} dx dy$$

$$\text{Let : } x = r \cos \varphi, y = r \sin \varphi$$

So :

$$I = \int_0^{\frac{\pi}{4}} d\varphi \int_0^{\sec \varphi} r^2 dr + \int_{\frac{\pi}{4}}^{\frac{\pi}{2}} d\varphi \int_0^{\csc \varphi} r^2 dr$$

$$I = \frac{1}{3} (\sqrt{2} + \ln(1 + \sqrt{2}))$$

486

487

488

489

490

491 Finally, the two squares are similar.

492

$$Q \frac{r_{ave}}{I} = \frac{\sqrt{\frac{F}{Yf}}}{2}$$

$$\therefore r_{ave} = \frac{1}{6} \sqrt{\frac{F}{Yf}} (\sqrt{2} + Ln(1 + \sqrt{2}))$$

498 A ‘tortuosity factor’  $\tau$  is defined as the ratio of actual distance to the straight-line  
499 distance from the plant. Therefore, the average delivery distance, which is expressed  
500 as  $r_{square}$  in this following formula, should be:

501

$$r_{square} = \frac{1}{6} \tau \sqrt{\frac{F}{Yf}} (\sqrt{2} + Ln(1 + \sqrt{2}))$$

502

503  
504 In this study, F, Y, f and  $\tau$  are assumed to be 18000 ton/year, 5 ton/acre per year,  
505 60% and 1.5, respectively. Therefore, the average delivery distance is 1.76 miles.

## 506 5 Investment and production cost

### 507 5.1 The investment

508

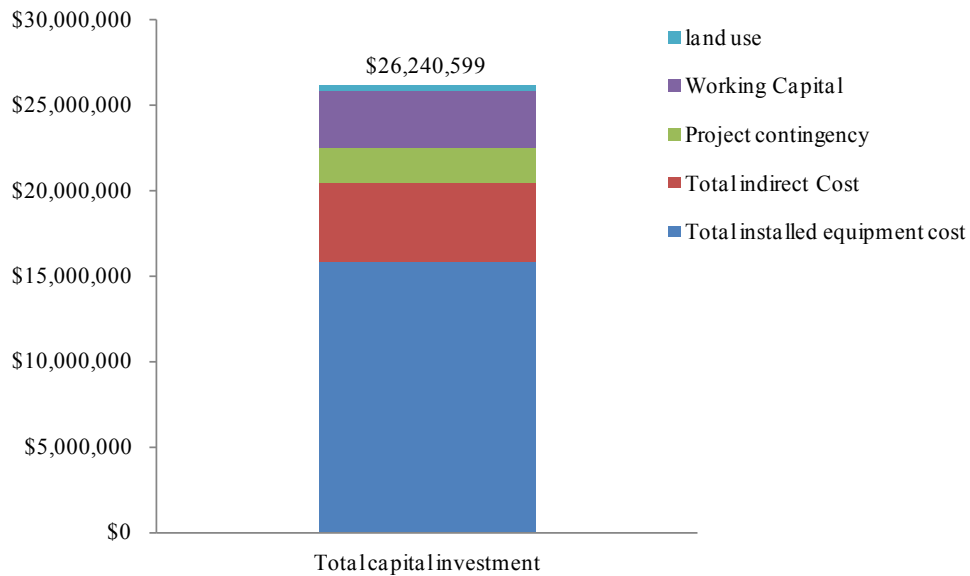

509

510

511

512

513

514

515

516

517

518

519

520

521

522

523 **Fig. S2** Total capital investment of the process

524

525 As showed in Fig. S2, which represents total capital investment as the  
526 summation of total installed equipment cost, total indirect cost, project contingency,

527 working capital cost, and land use, the total capital investment for the biorefinery  
528 process amounts to \$26.2 million, while the total installed equipment cost of the  
529 whole process is \$15.7 million. Such a scale of investment is one order smaller than  
530 the investment scale of biofuel plants.<sup>7, 14, 15</sup> However, Chemicals have normally  
531 higher added value than fuels. And this allows chemical plants can be operated with  
532 smaller scale of economies than fuel plants when the two kinds of plants have the  
533 same profit margin. Since the biorefinery process consists of four sub-processes, it is  
534 important to know the percentage of the total installed equipment cost for each sub-  
535 process.

536 Fig. S3 shows the relative weightings (percentage) of the four sub-processes  
537 represented in the total installed equipment cost of the whole process. Bio-oil  
538 preparation and separation (sub 1), extraction of levoglucosan (sub 2) and preparation  
539 of deicer (sub 4) separately contribute 38%, 34% and 25% of the total installed  
540 equipment cost, respectively. The really amazing thing about this figure is that  
541 production of renewable phenol resin (sub 3) is the smallest (only 3%) contributor to  
542 the total installed equipment cost. The reason is that the production of renewable  
543 phenol resin requires a minimum number of unit operations or equipments in  
544 comparison with other three sub-processes. From an economic point of view, the sub-  
545 process 4, the preparation of deicer, seemingly is not feasible or cost-effective  
546 because the total installed cost for the sub-process 4 accounts for 25% of the total but  
547 the selling price (\$700/ton) and the production rate (37kg/h) of the deicer are all  
548 comparatively low. On the other hand, it can be expected that the extraction of  
549 levoglucosan and the production of renewable phenol resin are all cost-effective  
550 because levoglucosan is a high added-value product and the production of renewable  
551 phenol resin needs relatively small equipment investment.

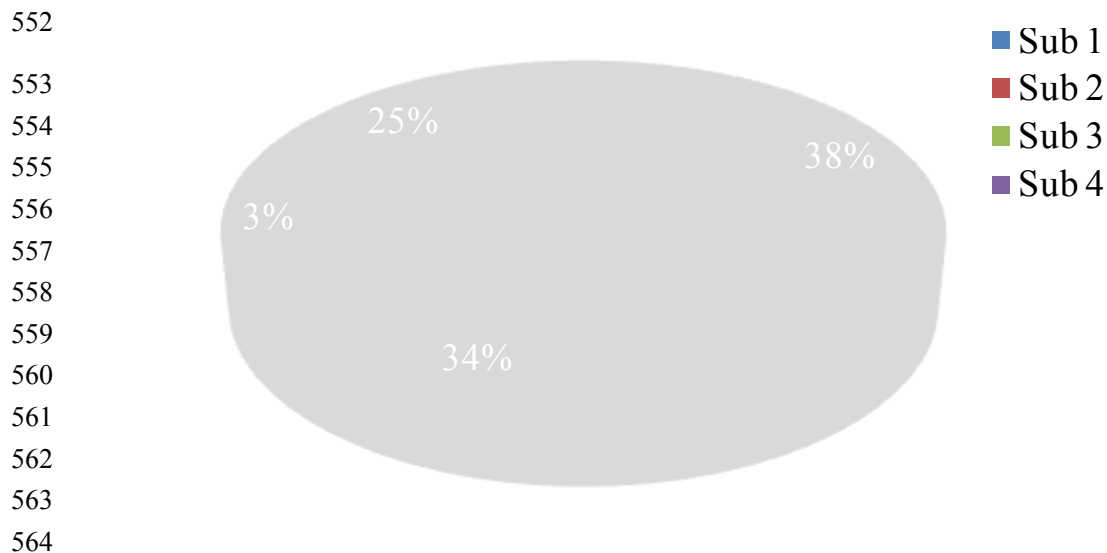

565 **Fig. S3 The percentage of the total installed equipment cost for each sub-process**

## 566 5.2 The production cost

567 Determination of the necessary capital investment is only one part of a complete



568 cost estimate. Another equally important part is the estimation of costs for operating  
 569 the plant or process. Fig. S4 shows the annual direct production costs for cotton straw  
 570 to levoglucosan, renewable phenol resin and deicer. Similar to Fig. S3, the direct  
 571 production cost of the whole process is breakdown to each sub-process area in Fig. S4.  
 572

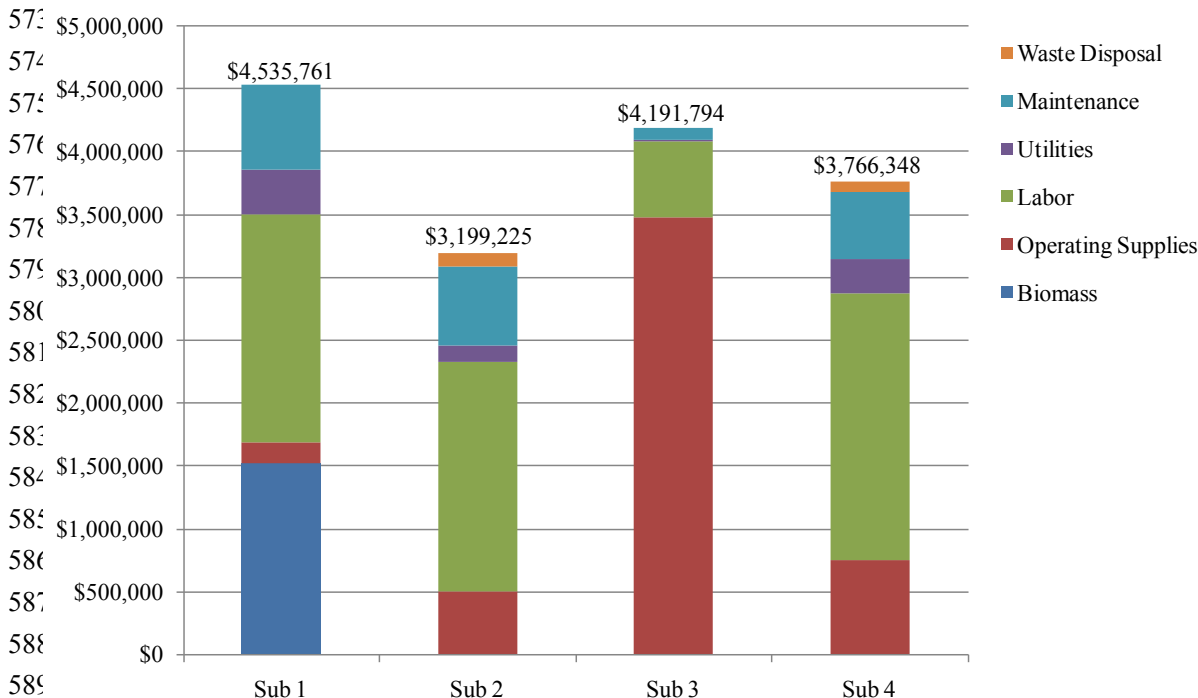

590 **Fig. S4** The annual direct production costs

591 The direct production costs of the four sub-processes vary from around \$3.2  
 592 million/year to \$4.5 million/year, and total up to \$15.7 million/year. There is not  
 593 much difference between the annual direct production cost of sub 4 (preparation of  
 594 deicer) and the annual direct production cost of sub 2 (extraction of levoglucosan) or  
 595 sub 3 (production of renewable phenol resin). However, in consideration of the yearly  
 596 outputs and product prices of the three chemicals, it can be also inferred that sub 4  
 597 (preparation of deicer) is not cost-effective. The labor costs of sub 1 (bio-oil  
 598 preparation and separation), 2 (extraction of levoglucosan) and 4 (preparation of  
 599 deicer) are the largest contributors to the annual direct production costs of the three  
 600 sub-processes, respectively. This is because each of the three sub-processes contains  
 601 quite a number of unit operations or equipments, which require a number of operating  
 602 labor and a certain amount of direct supervisory and clerical labor for operation. On  
 603 the basis of the same reason, the maintenance costs of the three sub-processes account  
 604 for the certain proportion of the annual direct production costs of the three sub-  
 605 processes. The operating supplies of sub 3 (production of renewable phenol resin)  
 606 comprise the vast majority of the annual direct production cost of this sub-process  
 607 because a substantial number of phenol and formaldehyde are used in the sub-process.  
 608 Direct production cost is only part of operating cost. The operating cost include all  
 609 expenses directly connected with the manufacturing operation or the physical  
 610 equipment of a process plant itself. However, unlike direct production cost, operating

611 cost is not appropriate for being breakdown to process area because it includes plant-  
 612 overhead costs, which are reserved for hospital and medical services, safety services,  
 613 salvage services and warehouse facilities, etc.

614 As shown in Fig. S5, the operating cost of the whole process is around \$22.2  
 615 million/year. The annual direct production cost, fixed charge and plant-overhead cost  
 616 of the whole process account for about 71%, 12% and 17% of the operating cost,  
 617 respectively. These percents are basically similar to other techno-economic analyses  
 618 of some biorefinery processes via fast paralysis.<sup>7, 8</sup> However, the labor cost of the  
 619 whole process occupies about 29% of the operating cost; In comparison with  
 620 production of biofuels,<sup>7, 8, 15</sup> this percent is remarkably higher. There could be three  
 621 reasons to explain this. Firstly, production of chemicals usually needs more  
 622 purification steps or equipments than production of fuels. Secondly, not one chemical  
 623 but three chemicals are produced in this birefinery process. Finally, mass production  
 624 of biofuels usually is a continuous process, while the production of the three  
 625 chemicals contains some batch steps. These reasons could result in more labor  
 626 requirement in this birefinery process.

627

628

629 \$25,000,000

630

631 \$22,245,283

632

633 \$20,000,000

634

635 \$15,000,000

636

637 \$10,000,000

638

639 \$5,000,000

640

641 \$0

642

643

644

645

646

647

648

649

650

651

652

653

654

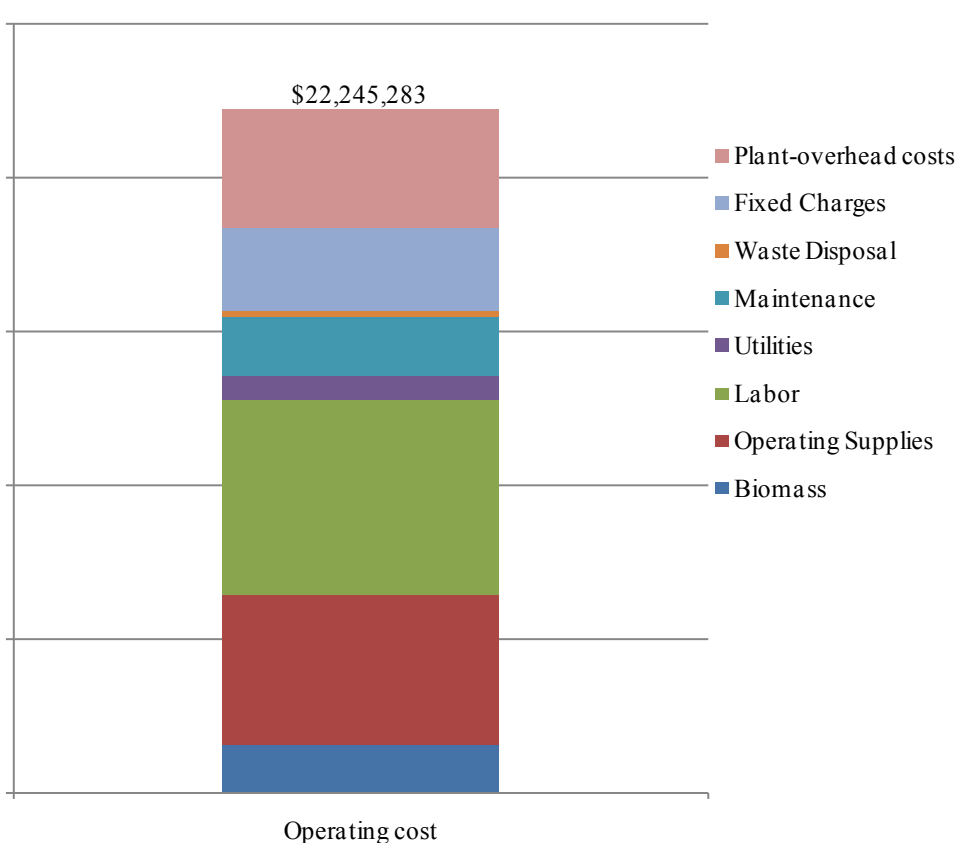

**Fig. S5** The operating cost of the whole process

655  
656  
657

## 658 **6 Some background data for this LCA study**

### 659 **6.1 LCI data for petrochemical production of phenol - formaldehyde resins (PF)**

660 Wilson et al. has developed an life-cycle inventory of formaldehyde-base resins  
661 used in wood composites in terms of resources, emissions, energy and carbon.<sup>16</sup> The  
662 LCI for the production of PF is shown in Table S7, in which the environmental  
663 burdens of the delivery of chemicals to the resin plants are ignored.

664 **Table S7** LCI data for conventional PF production route

| Materials, Energy and Emissions | Value    | Units                             |
|---------------------------------|----------|-----------------------------------|
| Phenol                          | 2.44E-01 | kg /kg <sub>PF</sub>              |
| Methanol                        | 2.09E-01 | kg /kg <sub>PF</sub>              |
| Sodium hydroxide                | 6.10E-02 | kg /kg <sub>PF</sub>              |
| Process water                   | 3.34E-01 | kg /kg <sub>PF</sub>              |
| Cooling water from river (20°C) | 1.56E-02 | kg /kg <sub>PF</sub>              |
| Electricity                     | 3.56E-02 | kWh /kg <sub>PF</sub>             |
| Natural gas                     | 8.21E-03 | Nm <sup>3</sup> /kg <sub>PF</sub> |
| Propane                         | 2.93E-06 | L /kg <sub>PF</sub>               |
| Carbon dioxide                  | 1.76E-02 | kg /kg <sub>PF</sub>              |
| Carbon monoxide                 | 3.81E-05 | kg /kg <sub>PF</sub>              |

### 665 **6.2 LCI data for petrochemical production of calcium acetate**

666 Overcash et al has presented gate-to-gate process energy use for a calcium  
667 acetate manufacturing process, in which calcium hydroxide and acetic acid were used  
668 as raw materials.<sup>17</sup> On the basis of the work of Overcash et al, LCI data for  
669 petrochemical production of calcium acetate is shown in Table S8.

670 **Table S8** LCI data for petrochemical production of calcium acetate

| Materials, Energy and Emissions | Value    | Units                             |
|---------------------------------|----------|-----------------------------------|
| Calcium hydroxide               | 4.69E-01 | kg /kg <sub>Calcium acetate</sub> |
| Acetic acid                     | 7.59E-01 | kg /kg <sub>Calcium acetate</sub> |
| Steam (6bar)                    | 1.53E+00 | MJ /kg <sub>Calcium acetate</sub> |
| Electricity                     | 1.05E-03 | MJ /kg <sub>Calcium acetate</sub> |
| Natural gas                     | 9.32E-01 | MJ /kg <sub>Calcium acetate</sub> |
| Carbon dioxide                  | 5.22E-02 | kg /kg <sub>Calcium acetate</sub> |

671 **6.3 The GWP100a, CED, EI-99 metric for some chemicals and utilities**

672 Cradle-to-gate LCIA results according to the GWP100a, CED, EI-99 metric for  
 673 some chemicals and utilities used in this process are listed in Table S9. All the data is  
 674 mainly based on ecoinvent 2.2 database, and a few of the data is derived from some  
 675 LCA documents. These LCA documents are listed in the last row in Table S9.

676 **Table S9** The GWP100a, CED, EI-99 metric for some chemicals and utilities

| Substance                           | GWP100a<br>(kgCO <sub>2</sub> -eq/kg) | CED <sub>non-renewable</sub><br>(MJ <sub>eq</sub> /kg) | EI-99<br>(Points/kg) |
|-------------------------------------|---------------------------------------|--------------------------------------------------------|----------------------|
| <i>Materials</i>                    |                                       |                                                        |                      |
| Sulfuric acid (98 wt. %)            | 1.20E-01                              | 2.02E+00                                               | 4.00E-02             |
| Process water                       | 2.45E-05                              | 2.79E-04                                               | 1.83E-06             |
| Activated carbon <sup>a</sup>       | 2.94E-01                              | 5.92E+00                                               | 1.76E-02             |
| Calcium hydroxide                   | 9.90E-01                              | 5.50E+00                                               | 3.00E-02             |
| Hydrochloric acid (32 wt. %)        | 8.53E-01                              | 1.75E+01                                               | 6.00E-02             |
| Ethyl acetate <sup>b</sup>          | 3.14E+00                              | 9.63E+01                                               | 3.36E-01             |
| Sodium hydroxide                    | 1.10E+00                              | 2.14E+01                                               | 6.00E-01             |
| Phenol                              | 3.48E+00                              | 1.21E+02                                               | 4.40E-01             |
| Formaldehyde (37 wt.%) <sup>b</sup> | 4.14E-01                              | 1.82E+01                                               | 6.25E-02             |
| Calcium oxide <sup>c</sup>          | 1.31E+00                              | 7.30E+00                                               | 2.80E-02             |
| Methanol <sup>b</sup>               | 7.64E-01                              | 4.08E+01                                               | 1.35E-01             |
| <i>Energy</i>                       |                                       |                                                        |                      |
| Diesel <sup>d</sup>                 | 1.29E-02                              | 1.20E+00                                               | 6.43E-03             |
| Electricity <sup>d</sup>            | 4.90E-01                              | 9.87E+00                                               | 2.00E-02             |
| Steam (6 bar) <sup>d</sup>          | 1.00E-01                              | 1.56E+00                                               | 5.77E-03             |
| Cooling water from river<br>(20°C)  | 0.00E+00                              | 0.00E+00                                               | 0.00E+00             |
| <i>Waste treatment</i>              |                                       |                                                        |                      |
| Waste liquid <sup>e</sup>           | 2.19E-02                              | 2.42E-01                                               | 5.00E-04             |
| Solid waste <sup>e</sup>            | 1.34E-02                              | 6.52E-01                                               | 4.22E-02             |

677

678 <sup>a</sup> Values based on the work of Arena et al.<sup>18</sup>

679 <sup>b</sup> Values based on the work of Amelio et al.<sup>19</sup>

680 <sup>c</sup> Values based on the works of Huijbregts et al. and Alvarez-Gaitan et al.<sup>20, 21</sup>

681 <sup>d</sup> Functional unit for diesel as well as steam is MJ and for electricity kWh

682 <sup>e</sup> Values based on the works of Rerat et al.<sup>22</sup>

## References

- 1 K. A. Kobe, *Plant Design and Economics for Chemical Engineers*, McGraw-Hill, 1991.
- 2 G. Towler and R. K. Sinnott, *Chemical engineering design: principles, practice and economics of plant and process design*, Elsevier, 2012.
- 3 R. Snow, T. Allen, B. Ennis and J. Litster, *Perry's chemical engineers' handbook*, 2008.
- 4 M. Morales, M. Ataman, S. Badr, S. Linster, I. Kourlimpinis, S. Papadokostantakis, V. Hatzimanikatis and K. Hungerbuhler, *Energy Environ. Sci.*, 2016, **9**, 2794-2805.
- 5 Q. Li, Y. Zhang and G. Hu, *Bioresour. Technol.*, 2015, **191**, 88-96.
- 6 Y. Zhang, T. R. Brown, G. Hu and R. C. Brown, *Bioresour. Technol.*, 2013, **127**, 358-365.
- 7 E. Henrich, N. Dahmen and E. Dinjus, *Biofuels, Bioprod. Bioref.*, 2009, **3**, 28-41.
- 8 C. Jiménez-González, S. Kim and M. R. Overcash, *Int. J. Life. Cycle. Ass.*, 2000, **5**, 153-159.
- 9 Alibaba, Levoglucosan, [https://www.alibaba.com/product-detail/Levoglucosan-498-07-7\\_521299548.html?spm=a2700.7724838.0.0.rIFtq8](https://www.alibaba.com/product-detail/Levoglucosan-498-07-7_521299548.html?spm=a2700.7724838.0.0.rIFtq8), accessed 05/01/2017, 2017.
- 10 Carbosynth, Levoglucosan, [http://www.carbosynth.com/carbosynth/website.nsf/\(w-productdisplay\)/186B041DE4AA69F080256D8F003304BA](http://www.carbosynth.com/carbosynth/website.nsf/(w-productdisplay)/186B041DE4AA69F080256D8F003304BA), accessed 05/01/2017, 2017.
- 11 Guidechem, The phenolic resin 551 from America, <http://china.guidechem.com/trade/pdetail7363823.html>, accessed 05/01/2017, 2017.
- 12 Alibaba, Calcium Acetate BP/USP, [https://www.alibaba.com/product-detail/Calcium-Acetate-BP-USP\\_60154097956.html?spm=a2700.7724838.0.0.Ds8gK7&s=p](https://www.alibaba.com/product-detail/Calcium-Acetate-BP-USP_60154097956.html?spm=a2700.7724838.0.0.Ds8gK7&s=p), accessed 05/01/2017, 2017.

- 13 M. M. Wright, R. C. Brown and A. A. Boateng, *Biofuels, Bioprod. Bioref.*, 2008, **2**, 229-238.
- 14 M. Wright and R. C. Brown, *Biofuels, Bioprod. Bioref.*, 2007, **1**, 191-200.
- 15 Y. N. Zhang, T. R. Brown, G. P. Hu and R. C. Brown, *Biomass Bioenergy*, 2013, **51**, 99-108.
- 16 J. B. Wilson, *Wood Fiber Sci.*, 2010, **42**, 125-143.
- 17 S. Kim and M. Overcash, *J. Chem. Technol. Biot.*, 2003, **78**, 995-1005.
- 18 N. Arena, J. Lee and R. Clift, *J. Clean Prod.*, 2016, **125**, 68-77.
- 19 A. Amelio, G. Genduso, S. Vreysen, P. Luis and B. Van der Bruggen, *Green Chem.*, 2014, **16**, 3045-3063.
- 20 J. P. Alvarez-Gaitan, G. M. Peters, H. V. Rowley, S. Moore and M. D. Short, *Int. J. Life. Cycle. Ass.*, 2013, **18**, 1291-1301.
- 21 M. A. Huijbregts, S. Hellweg, R. Frischknecht, H. W. Hendriks, K. Hungerbühler and A. J. Hendriks, *Environ. Sci. Technol.*, 2010, **44**, 2189-2196.
- 22 C. Rerat, S. Papadokonstantakis and K. Hungerbühler, *J. Air Waste Manage.*, 2013, **63**, 349-366.
